# Supplementary material for: Xanthine Oxidase Inhibitor Allopurinol Prevents Oxidative Stress‐Mediated Atrial Remodeling in Alloxan‐Induced Diabetes Mellitus Rabbits
Source: PubMed Central journal article supplement (PMC6015332; doi:10.1161/jaha.118.008807), 2018-05-02
Supplement: JAH3-7-e008807-s001.pdf [file JAH3-7-e008807-s001.pdf]

# **SUPPLEMENTAL MATERIAL**

**Table S1. Primary antibodies of proteins.**

| Proteins       | Companies of primary antibodies | Item No         |
|----------------|---------------------------------|-----------------|
| NF- $\kappa$ B | Abcam, USA                      | ab90523         |
| TGF- $\beta$   | Abcam, USA                      | ab190503        |
| P38            | Abcam, USA                      | ab131186        |
| P-p38          | Abcam, USA                      | ab4822          |
| ERK            | Abcam, USA                      | Unavailable*    |
| P-ERK          | Abcam, USA                      | Unavailable*    |
| JNK            | Abcam, USA                      | ab10664         |
| P-JNK          | Abcam, USA                      | ab4821          |
| XO             | Abcam, USA                      | ab109235        |
| MnSOD          | Abcam, USA                      | ab13533         |
| TFAM           | Novus Biologicals               | NBP2-19437      |
| NRF-1          | Abcam, USA                      | ab111746        |
| Drp-1          | Abcam, USA                      | ab140494        |
| Mfn1           | Abcam, USA                      | ab104274        |
| Cav1.2         | Abcam, USA                      | ab58552         |
| RyR2           | LifeSpan Biosciences            | LS-C93425/61935 |
| SERCA2a        | Gene Tex                        | GTX22817        |
| FKBP12.6       | Abcam, USA                      | ab82316         |
| PLB            | Abcam, USA                      | ab2865          |
| P-PLB          | Abcam, USA                      | Ab15000         |

\*The antibodies were given as a gift by others and the special details were unavailable.
